# Supplementary material for: δ 11 B as monitor of calcification site pH in divergent marine calcifying organisms
Source: Copernicus journal article supplement (doi:10.5194/bg-15-1447-2018), 2018-03-08
Supplement: Supplementary file 1 [file bg-15-1447-2018-supplement.pdf]

Supplement of Biogeosciences, 15, 1447–1467, 2018  
<https://doi.org/10.5194/bg-15-1447-2018-supplement>  
© Author(s) 2018. This work is distributed under  
the Creative Commons Attribution 3.0 License.

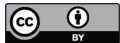

*Supplement of*

## $\delta^{11}\text{B}$ as monitor of calcification site pH in divergent marine calcifying organisms

Jill N. Sutton et al.

*Correspondence to:* Jill N. Sutton ([jill.sutton@univ-brest.fr](mailto:jill.sutton@univ-brest.fr)) and Robert A. Eagle ([robeagle@g.ucla.edu](mailto:robeagle@g.ucla.edu))

The copyright of individual parts of the supplement might differ from the CC BY 3.0 License.

Supplementary Table 1. Example of relationship between pH and predicted  $\delta^{11}\text{B}_{\text{CaCO}_3}$  using Eq. 1 where  $\text{pK}_\text{B}$  is 8.6152 (at 25°C and 32 psu; Dickson, 1990),  $\delta^{11}\text{B}_{\text{SW}}$  is 39.61 ‰ (Foster et al., 2010), and  $\alpha$  is 1.0272 (Klochko et al., 2006). The difference between each predicted  $\delta^{11}\text{B}_{\text{CaCO}_3}$  change is noted to exemplify the influence of pH. For example, a change in pH from 7.75 to 7.80 results in a difference in predicted  $\delta^{11}\text{B}_{\text{CaCO}_3}$  of 0.35 ‰ (15.77 ‰ – 15.42 ‰). Note: the sensitivity of predicted  $\delta^{11}\text{B}_{\text{CaCO}_3}$  to pH increases with pH (up to  $\text{pK}_\text{B}$ ).

| pH   | $\delta^{11}\text{B}_{\text{CaCO}_3}$<br>(‰) | Difference<br>(‰) |
|------|----------------------------------------------|-------------------|
| 7.70 | 14.98                                        |                   |
| 7.75 | 15.3                                         | 0.32              |
| 7.80 | 15.64                                        | 0.34              |
| 7.85 | 16.01                                        | 0.37              |
| 7.90 | 16.42                                        | 0.41              |
| 7.95 | 16.86                                        | 0.44              |
| 8.00 | 17.33                                        | 0.47              |
| 8.05 | 17.84                                        | 0.51              |
| 8.10 | 18.38                                        | 0.54              |
| 8.15 | 18.96                                        | 0.58              |
| 8.20 | 19.57                                        | 0.61              |
| 8.25 | 20.21                                        | 0.64              |
| 8.30 | 20.89                                        | 0.68              |
| 8.35 | 21.6                                         | 0.71              |
| 8.40 | 22.32                                        | 0.72              |
| 8.50 | 23.85                                        | 1.53              |

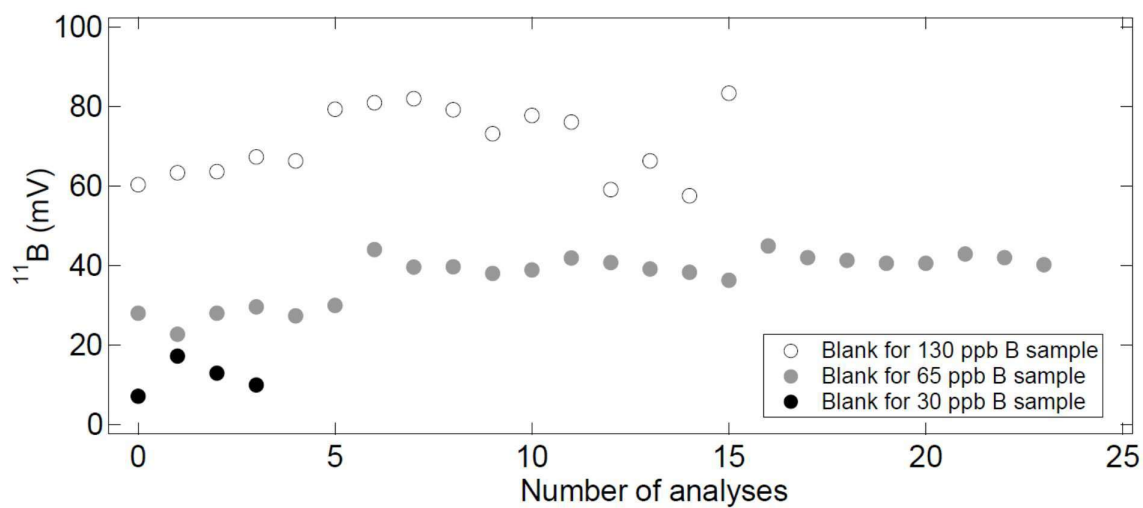

Fig. S1. Blank intensities for  $^{11}\text{B}$  where NIST951 was measured at concentrations of 30 ppb, 65 ppb, and 130 ppb.
